# Supplementary material
Source: PubMed Central journal article supplement (PMC419664)

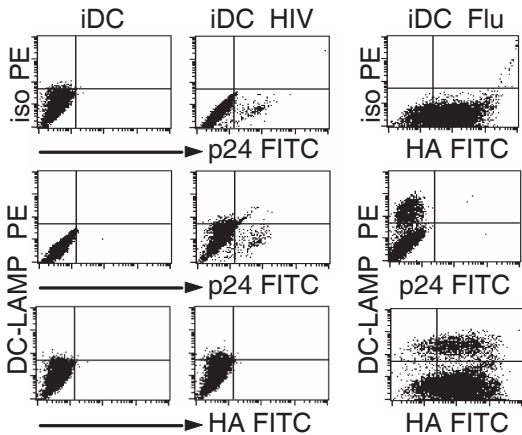

Supplement: pnas_101_20_7669__2.pdf [file pnas_101_20_7669__2.pdf]

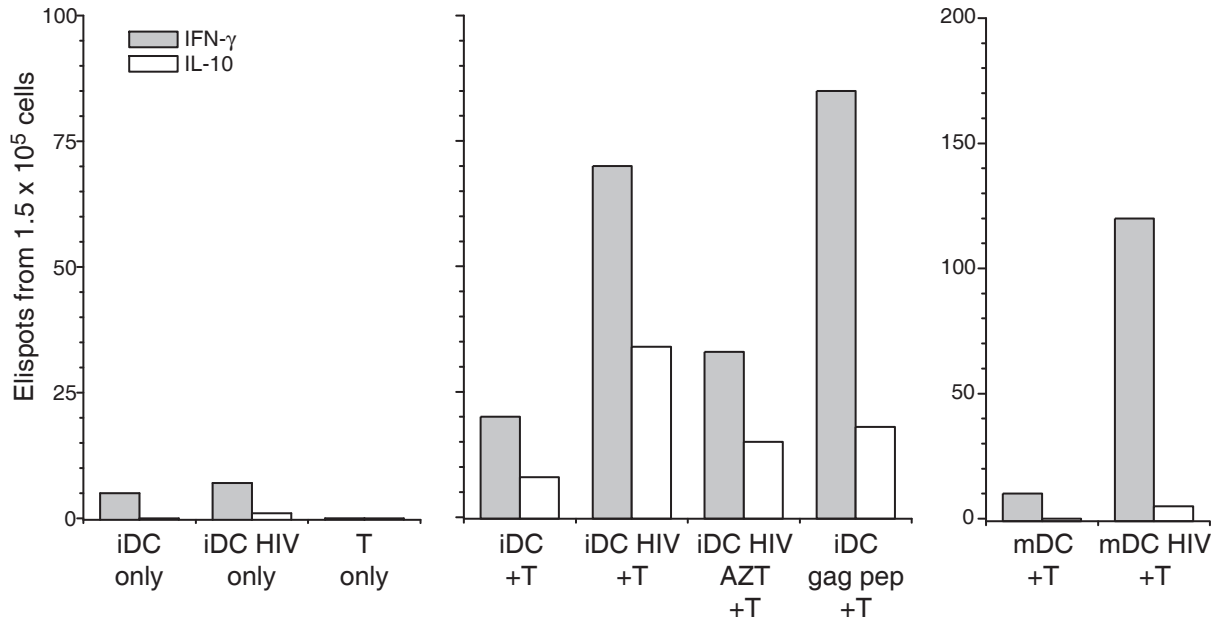

Supplement: pnas_101_20_7669__3.pdf [file pnas_101_20_7669__3.pdf]
